# Supplementary material
Source: publisher figshare collection journal article supplement (https://acs.figshare.com/ndownloader/files/18666527)
Supplement: Supplementary file 1 [file 18666527]

Supporting Information

# Controlled Plasma-Thinning of Bulk MoS<sub>2</sub> Flakes for Photodetector Fabrication

Foad Ghasemi<sup>1\*</sup>, Ali Abdollahi<sup>2</sup> and Shams Mohajerzadeh<sup>2</sup>

<sup>1</sup> Nanoscale Physics Device Lab (NPDL), Department of Physics,

University of Kurdistan, Sanandaj, Iran, 66177-15175.

<sup>2</sup> Nanoelectronic Lab, School of Electrical and Computer Eng,

University of Tehran, Tehran, Iran, 14399-56191

\* F.ghasemi@uok.ac.ir

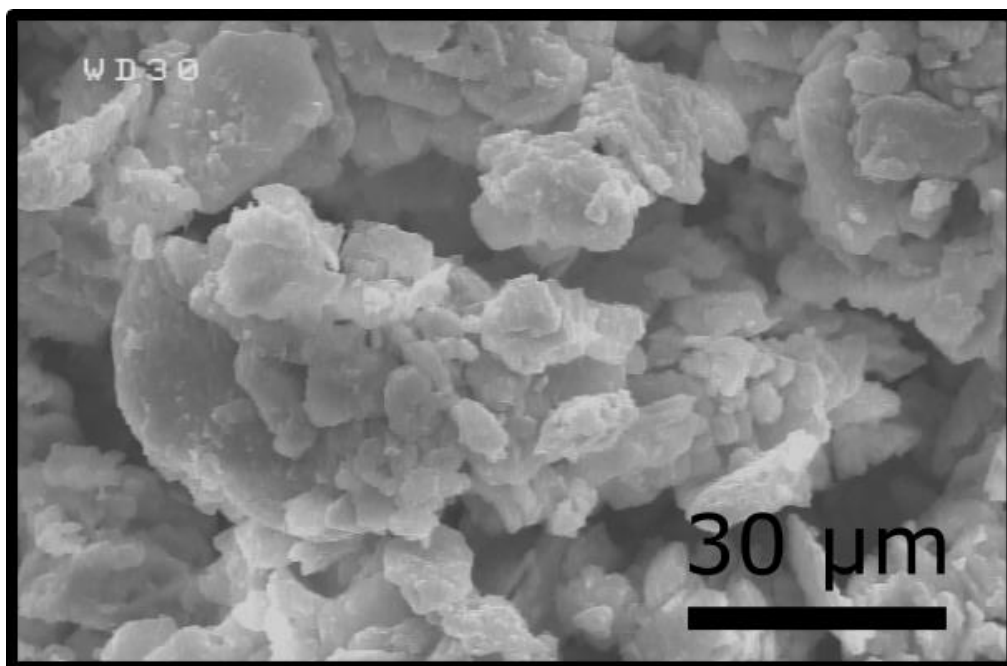

**Figure S1** SEM image of bulk MoS<sub>2</sub> powders.

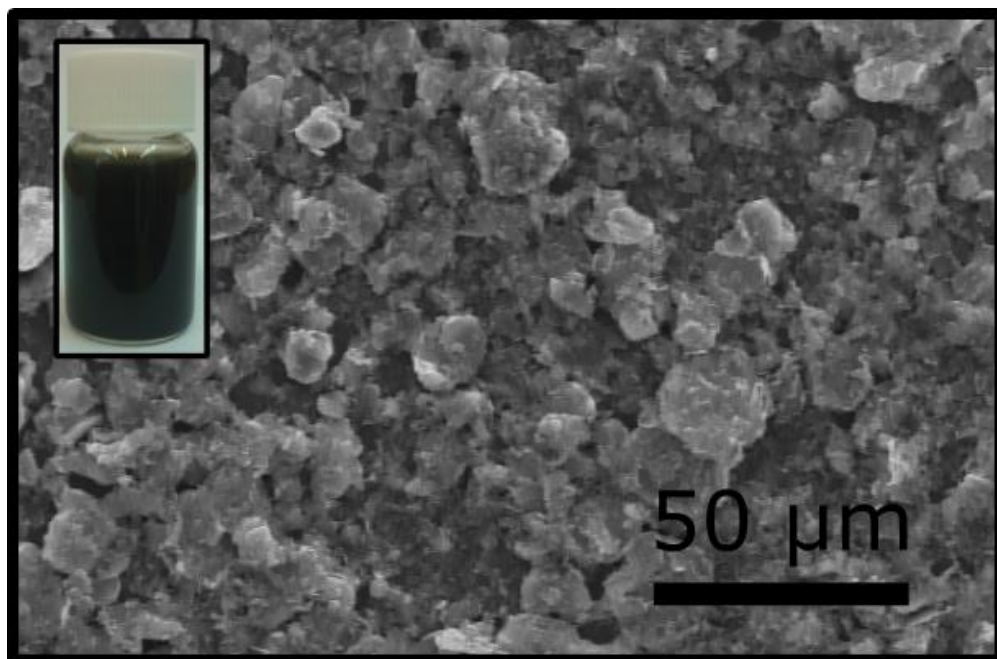

**Figure S2** SEM image of the 15 min sonicated MoS<sub>2</sub> flakes with corresponding dispersion shown in inset.

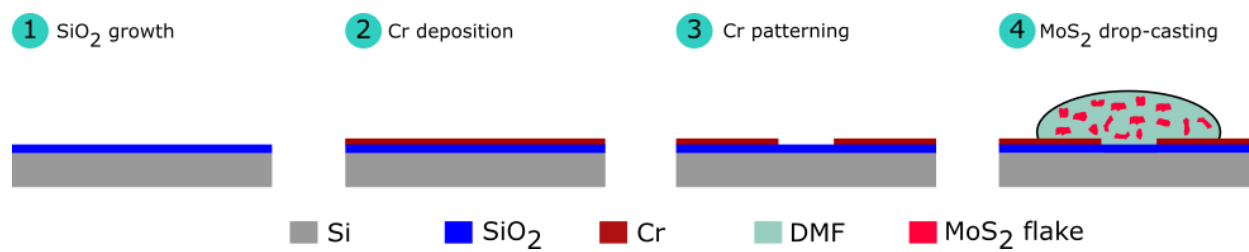

**Figure S3** Schematic illustration of the device fabrication steps.

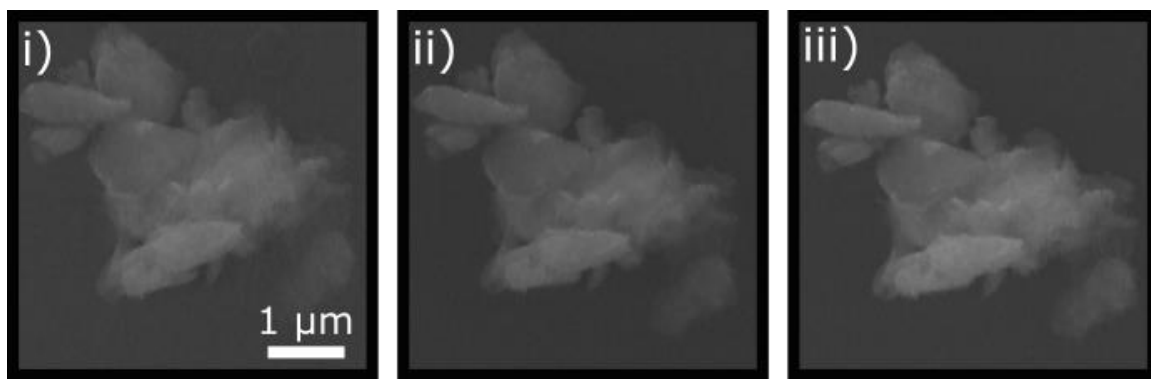

**Figure S4** SEM image of *i*- Pristine flake. *ii*- After 5 min H<sub>2</sub>:O<sub>2</sub> plasma (200 sccm, 200 W), *iii*- After 10 min H<sub>2</sub>:O<sub>2</sub> plasma (200 sccm, 200 W).

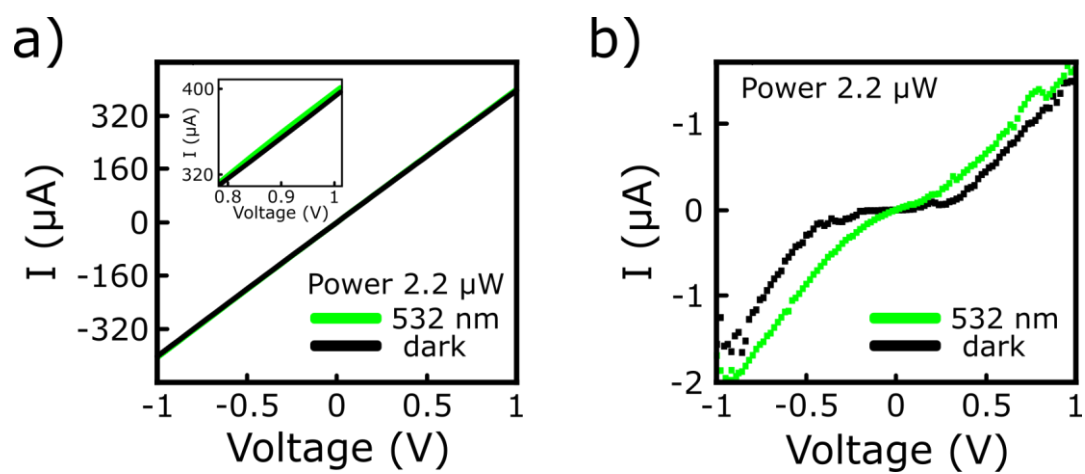

**Figure S5** Current-voltage measurements of the **a)** bulk and **b)** TMF photodetectors in dark and under 532 nm laser excitation at optical power of  $2.2 \mu\text{W}$ .
